# Supplementary material for: Highly sensitive broadband photomultiplication type all-polymer photodetectors and their applications in optical pulse counting
Source: Royal Society of Chemistry journal article supplement (doi:10.1039/d2tc02144g), 2022-01-01
Supplement: d2tc02144g2.pdf [file d2tc02144g2.pdf]

## Highly-sensitive Broadband Photomultiplication Type All-polymer

### Photodetectors and the Applications in Optical Pulse Counting

Kaixuan Yang<sup>a</sup>, Zijin Zhao<sup>a</sup>, Ming Liu<sup>a</sup>, Lianbin Niu<sup>\*b</sup>, Xingchao Zhao<sup>a</sup>, Guangcai Yuan<sup>\*c</sup>, Xiaoling Ma<sup>a</sup>, Fujun Zhang<sup>\*a</sup>

<sup>a</sup> Key Laboratory of Luminescence and Optical Information, Ministry of Education, Beijing Jiaotong University, 100044, Beijing, China

<sup>b</sup> College of Physics and Electronic Engineering, Chongqing Normal University, 401331, Chongqing, China

<sup>c</sup> Institute for Display and Sensor Devices BOE Technology Group Co. Ltd. No. 9 Dize Road, BDA, Beijing 100176, P. R. China

#### Corresponding author:

\*E-mail: 20130078@cqu.edu.cn (Lianbin); yuanguangcai@boe.com.cn (Guangcai); fjzhang@bjtu.edu.cn (Fujun)

#### Experimental section

##### Materials

The poly(9,9-bis(3'-(N,N-dimethyl)-N-ethylammonium-propyl-2,7-fluorene)-alt-2,7-(9,9-dioctylfluorene))dibromide (PFN-Br) was purchased from Organtec Materials Inc. The poly[(2,6-(4,8-bis(5-(2-ethylhexyl)thiophen-2-yl)-benzo[1,2-b:4,5-b']dithiophene))-alt-(5,5-(1',3'-di-2-thienyl-5',7'-bis(2-ethylhexyl)benzo[1',2'-c:4',5'-c']dithiophene-4,8-dione))] (PBDB-T) was purchased from Solarmer Materials Inc. The PYF-T-O was purchased from eFlexPV Co., Ltd. Lithium fluoride (LiF) was purchased from Jiuyuexincai Technology Co., Ltd. The patterned indium tin oxide (ITO)-coated glass substrates were purchased from South China Science & Technology Co., Ltd. Aurum (Au) was purchased from Zhongnuoxincai Technology Co., Ltd.

##### Device fabrication

The ITO-patterned glass substrates with sheet resistance of  $15 \Omega$  per square were successively washed in detergent, deionized water, and ethanol via ultrasonic cleaning, which were then dried up by high-purity nitrogen gas. The cleaned-up ITO/glass substrates were treated with oxygen plasma for 90 s, aimed for further cleaning and improving work function of ITO. The processed ITO/glass substrates were transferred to a high purity nitrogen-filled glove-box. The PFN-Br was dissolved in methanol to prepared  $0.6 \text{ mg mL}^{-1}$  pure solution. PBDB-T was dissolved in chloroform (CF) to prepare  $6 \text{ mg mL}^{-1}$  pure solution. PYF-T-O was dissolved in CF to prepare 28, 24, 20 and  $16 \text{ mg mL}^{-1}$  pure solutions. The weight ratio of PBDB-T:PYF-T-O in blend solution is 3:100.

The PFN-Br solution was spin-coated onto ITO/glass substrates at the speed of 3000 revolutions per minute (RPM) for 30 s. All the PBDB-T:PYF-T-O blend solutions were immediately spin-coated onto PFN-Br/ITO/glass substrates at the speed of 1000 RPM for 40 s after being stirred on a hotplate of  $60 \text{ }^\circ\text{C}$  for 30 min, which is aimed to prepare active layers with thickness of 140, 160, 180 and 200 nm. 1 nm LiF and 60 nm Au were sequentially thermally evaporated onto active layers in a high vacuum ( $10^{-4}$  Pa) chamber.

### **Device characterization**

The  $J$ - $V$  curves of PM-APDs were measured via a Keithley-2400 source meter. The incident monochromatic light was provided by a Xenon lamp coupled with a monochromator. The thickness of films was measured by an AMBIOS technology XP-2 stylus profilometer. The absorption spectra of neat films were obtained by a Shimadzu

UV-3101 PC spectrophotometer. The wavelength of incident light was scanned from 300 to 920 nm. The transient photocurrent of PM-APDs was recorded by a Tektronix 5140B oscilloscope under the 850 nm light illumination with intensity of  $1 \text{ mW cm}^{-2}$ . The total noise current of PM-APDs was obtained via fast Fourier transform (FFT) for dark current as a function of time.

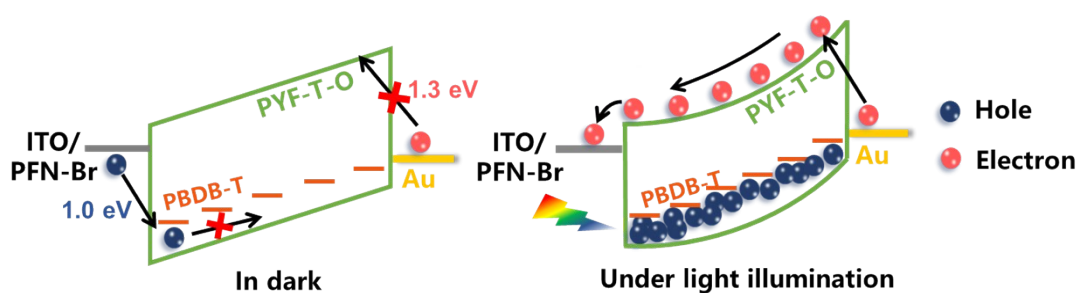

Fig. S1. Operation principle diagram of PM-APDs.

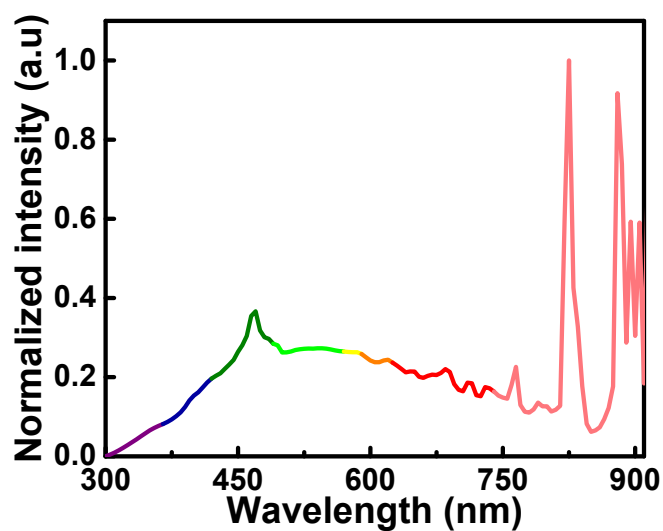

Fig. S2. Emission spectrum of incident light provided by a Xenon lamp coupled with monochromator.

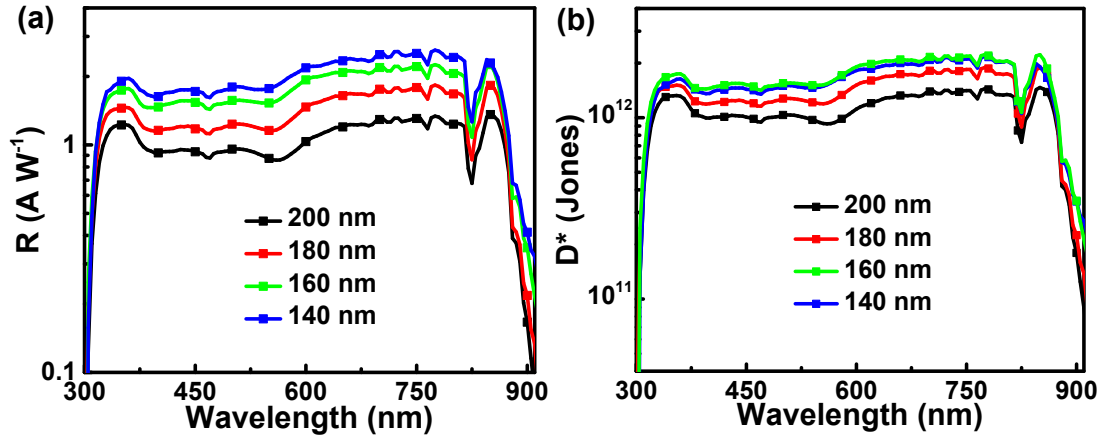

Fig. S3. (a) R and (b)  $D^*$  spectra of PM-APDs with different active layer thickness under 4 V bias.

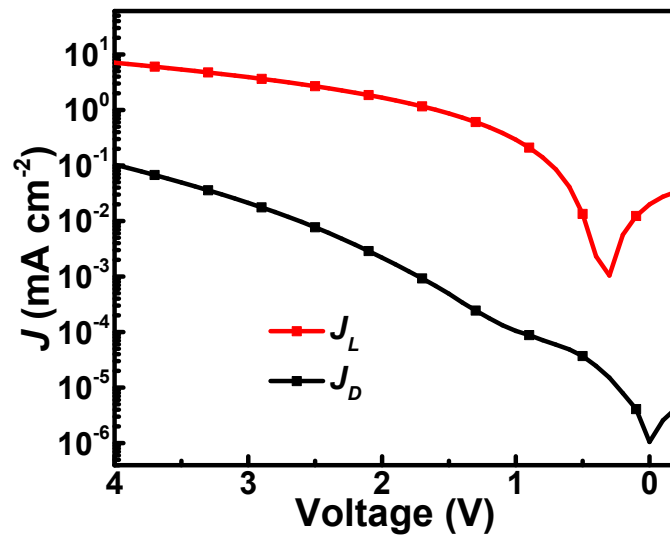

Fig. S4.  $J$ - $V$  curves of PM-APDs with LiF layer measured in dark and under white light illumination with the intensity of  $1 \text{ mW cm}^{-2}$ .

Table S1. R and  $D^*$  of PM-APDs with LiF layer at 850 nm incident light under 4 V bias.

| Light intensity ( $\mu\text{W cm}^{-2}$ ) | R ( $\text{A W}^{-1}$ ) | $D^*$ ( $10^{12}$ Jones) |
|-------------------------------------------|-------------------------|--------------------------|
| 130.42                                    | 34.3                    | 2.2                      |
| 19.13                                     | 47.2                    | 3.1                      |
| 2.81                                      | 64.6                    | 4.2                      |
| 0.42                                      | 82.3                    | 5.4                      |
| 0.06                                      | 86.2                    | 5.7                      |

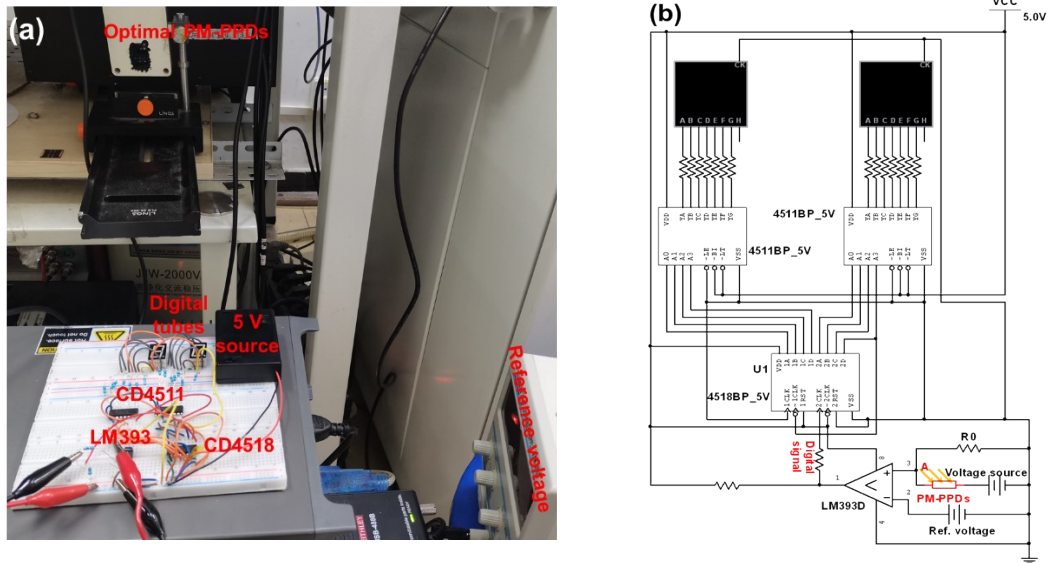

**Fig. S5.** (a) Photograph and (b) detailed circuit diagram of optical pulse counting based on optimal PM-APDs.
